# Supplementary material
Source: PubMed Central journal article supplement (PMC8026742)
Supplement: NIHMS1668447-supplement-1.pdf [file NIHMS1668447-supplement-1.pdf]

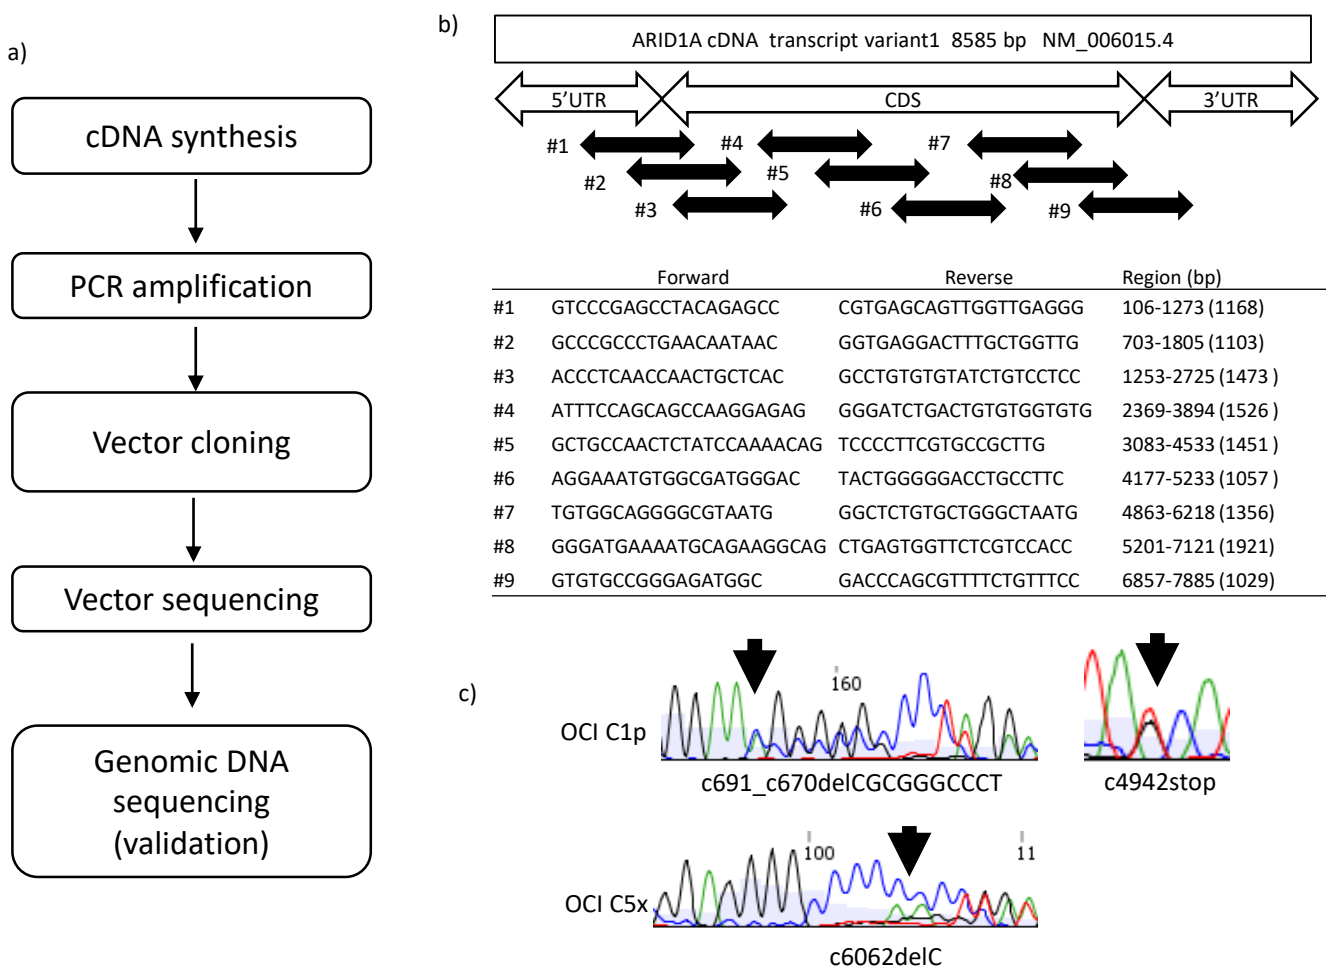

**Supplementary Figure 1. ARID1A sequencing in OCI cells.** a) Flowchart of ARID1A sequencing. (b) Primer pairs for cDNA PCR amplification. (c) The results of ARID1A mutation validated in the genomic DNA in OCI-C5x and OCI-C1p cells. No mutation was detected in OCI-C4p cells.
