# Supplementary material
Source: PubMed Central journal article supplement (PMC8026742)
Supplement: NIHMS1668447-supplement-2.pdf [file NIHMS1668447-supplement-2.pdf]

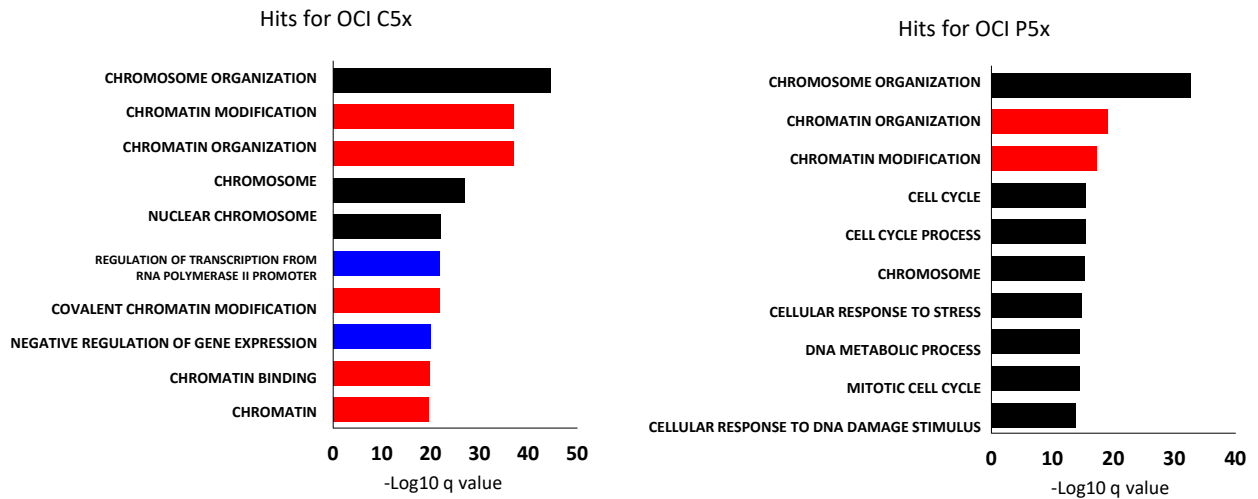

**Supplementary Figure 2. Gene Ontology (GO) enrichment analysis indicates OCI-C5x cells are more vulnerable to epigenetic interventions than OCI-P5x cells.** Hits for OCI-C5x or OCI-P5x summarized in Figure 1e were subjected to GSEA analysis in reference to genes annotated by the GO terms. Gene clusters highlighted in red are related to chromatin organization/modification. Clusters in blue are involved in gene transcription/gene expression regulation.
