# Supplementary material
Source: PubMed Central journal article supplement (PMC8026742)
Supplement: NIHMS1668447-supplement-3.pdf [file NIHMS1668447-supplement-3.pdf]

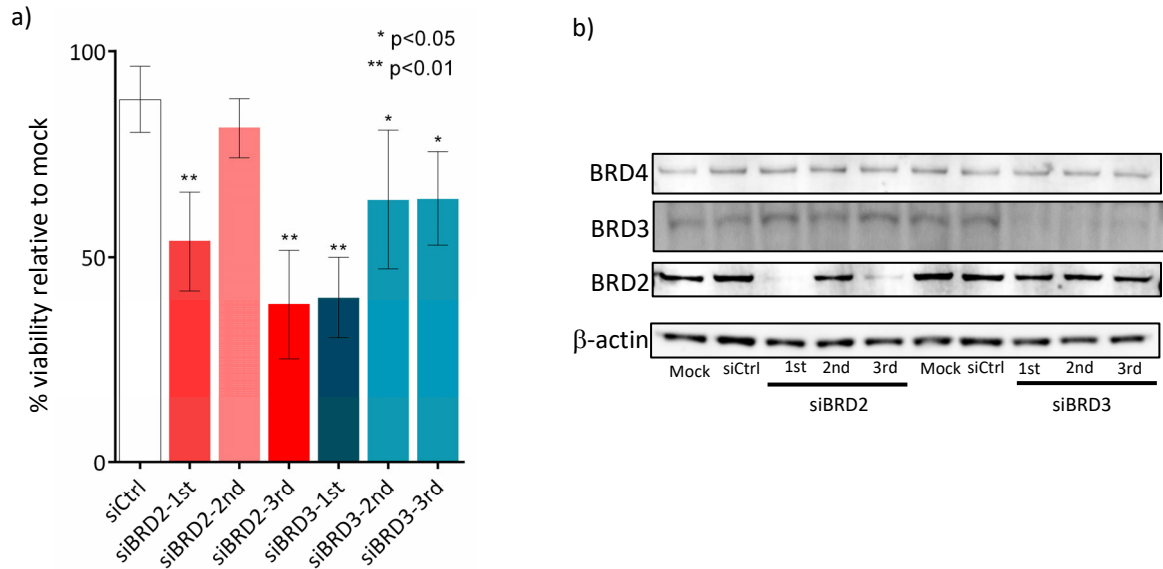

**Supplementary Figure S3. Individual dsRNA knockdown targeting BRD2 and BRD3 in OCI-C5x cells.** (a) The same number of OCI-C5x cells were plated on 96 well plates 24 hours prior to dsRNA transfection. Cells were transfected with 10nM of individual siRNAs targeting BRD2 (siBRD2-1<sup>st</sup>, 2<sup>nd</sup>, 3<sup>rd</sup>) and BRD3 (siBRD3-1<sup>st</sup>, 2<sup>nd</sup>, 3<sup>rd</sup>), which were equally mixed in the pooled dsRNA. Cell viability was assessed after 72 hours of transfection. Values were the means  $\pm$  SD of four independent assays. (b) Knockdown efficiency was validated by western blotting. Protein was harvested after 72 hours of transfection.
