# Supplementary material
Source: PubMed Central journal article supplement (PMC8026742)
Supplement: NIHMS1668447-supplement-4.pdf [file NIHMS1668447-supplement-4.pdf]

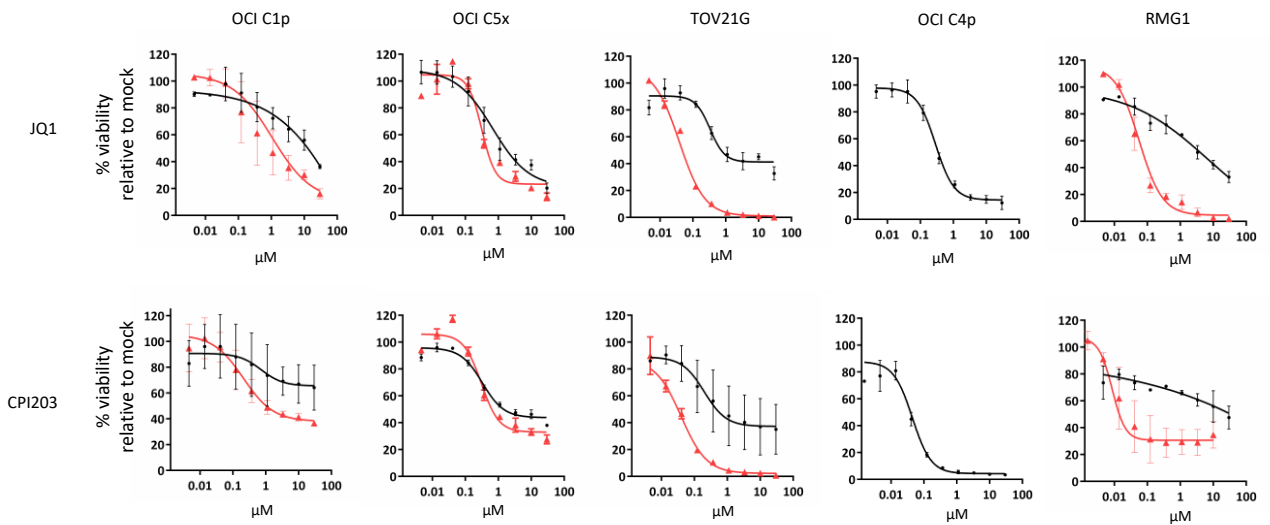

**Supplementary Figure 4. Dose-response curves of BET inhibitors JQ1 and CPI203 in OCCC cells.** Cells were treated with the indicated concentrations of JQ1 or CPI0610 for 72 hours (black) or 7 days (red). Values were the means  $\pm$  SD of three independent assays.
