# Supplementary material
Source: PubMed Central journal article supplement (PMC8026742)
Supplement: NIHMS1668447-supplement-5.pdf [file NIHMS1668447-supplement-5.pdf]

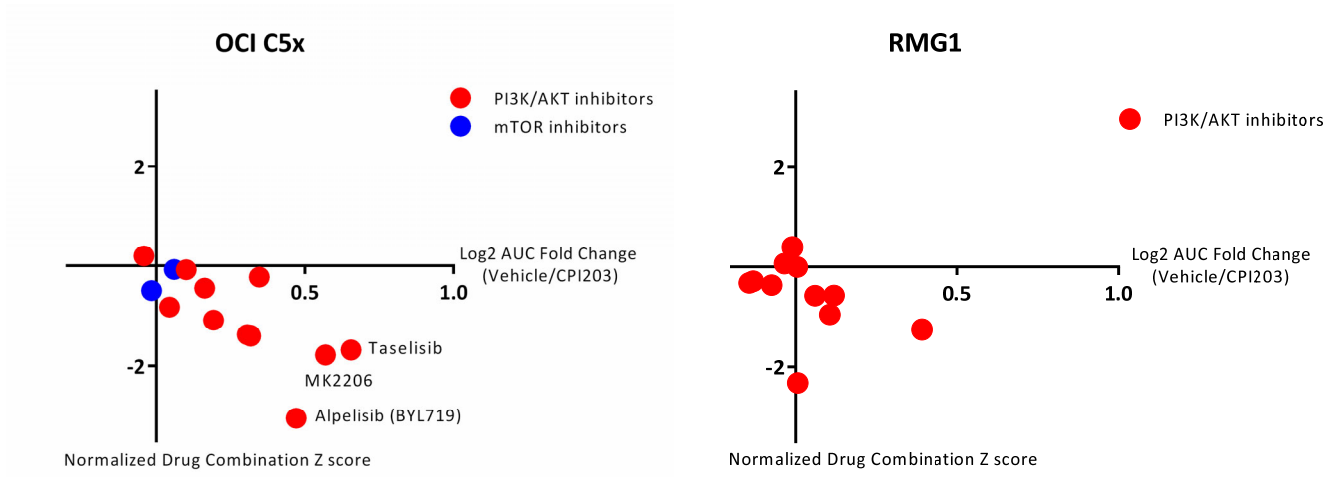

**Supplementary Figure 5. Combination drug screens with or without IC30 of CPI203 in OCI-C5x and RMG1 cells.** Results shown are limited to PI3K, AKT, or mTOR inhibitors.
